# Supplementary material for: The study of the synergistic effect of the oxysilane and phosphite-based flame retardant additive and its application in lithium-ion batteries
Source: Royal Society of Chemistry journal article supplement (doi:10.1039/d3nj05936g), 2024-01-01
Supplement: d3nj05936g1.pdf [file d3nj05936g1.pdf]

## Supporting Information

### **The study of the synergistic effect between oxysilane and phosphite-based flame retardant additive and its application in lithium-ion batteries**

YuChao Chen<sup>a</sup>, Jin Liang<sup>a\*</sup>, and Jiang Cao<sup>b</sup>

<sup>a</sup> *Central South University of Forestry and Technology, Changsha 410004, China*

<sup>b</sup> *Dongguan Deli New Energy Materials Co., Ltd, Dongguan 523542, China*

\*Corresponding author: [ljcfstu@163.com](mailto:ljcfstu@163.com)

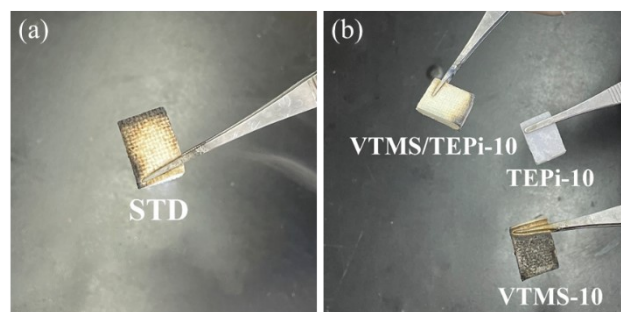

Figure S1 Photographs of fiberglass papers containing (a) standard electrolytes and (b) standard electrolytes with different additives (10 wt. %) after combustion

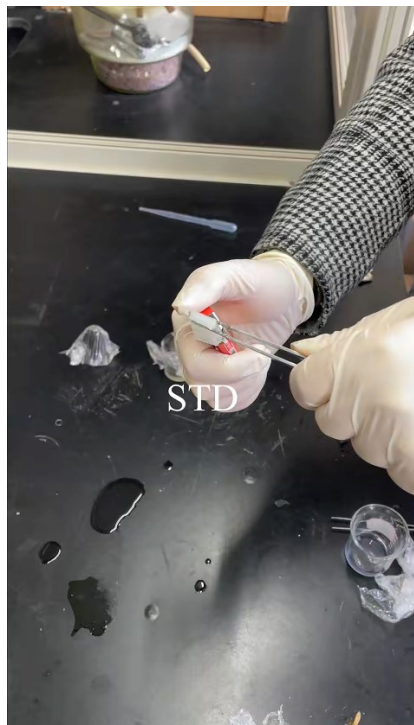

Video S1 Self-extinguishing test about standard electrolyte

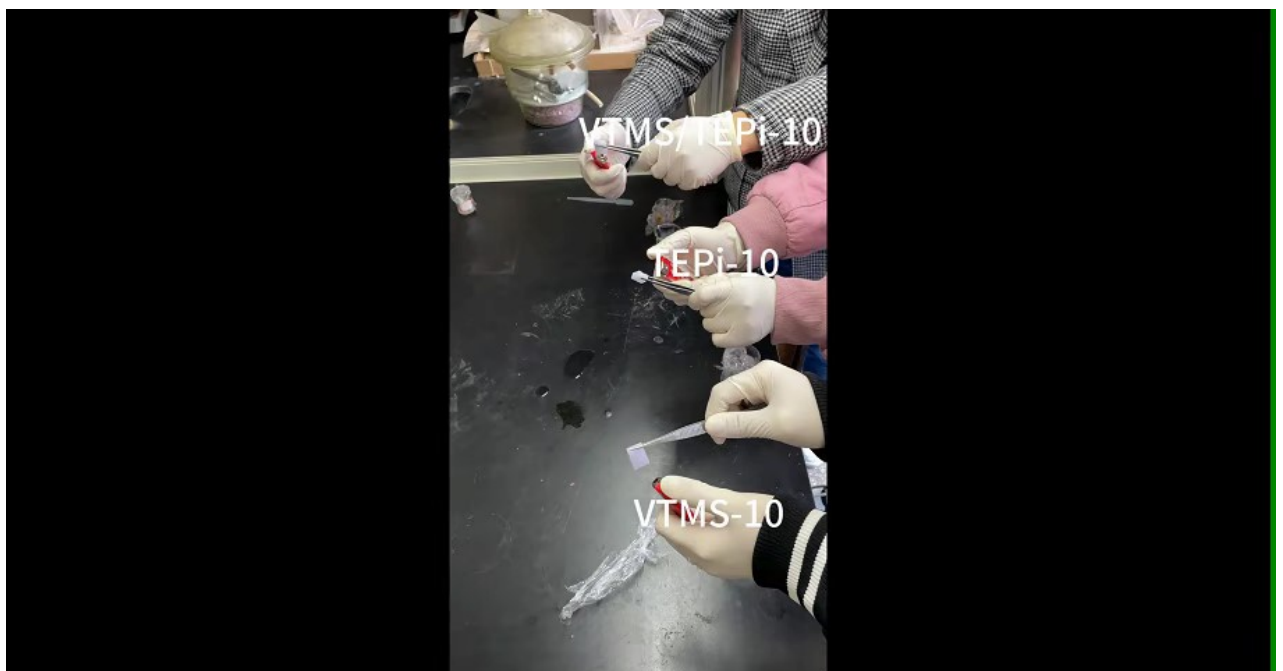

Video S2 Self-extinguishing test about standard electrolytes containing different additives (10 wt.%)

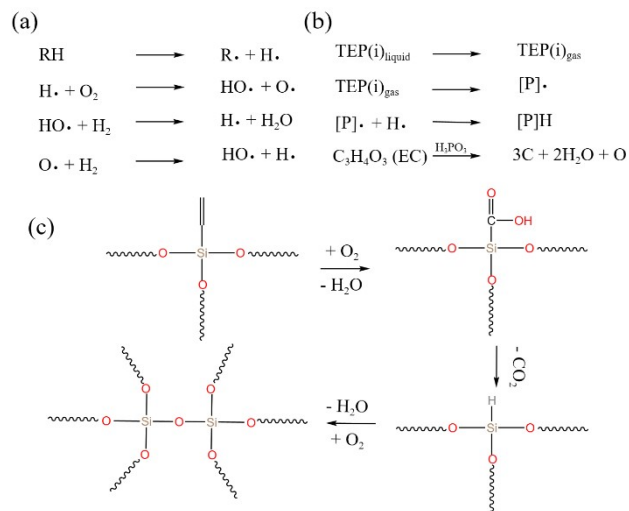

Figure S2 Illustrative depiction of the combustion process and mechanism of flame retardation (a) combustion process flame retardant mechanism of (b) phosphate ester; (c) Organosilicon

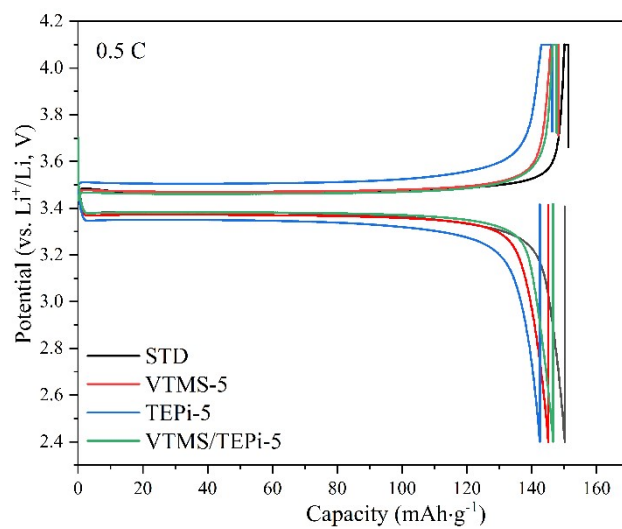

Figure S3 The electrochemical performance of Li|LiFePO<sub>4</sub> half cells with different additives at 0.5 C

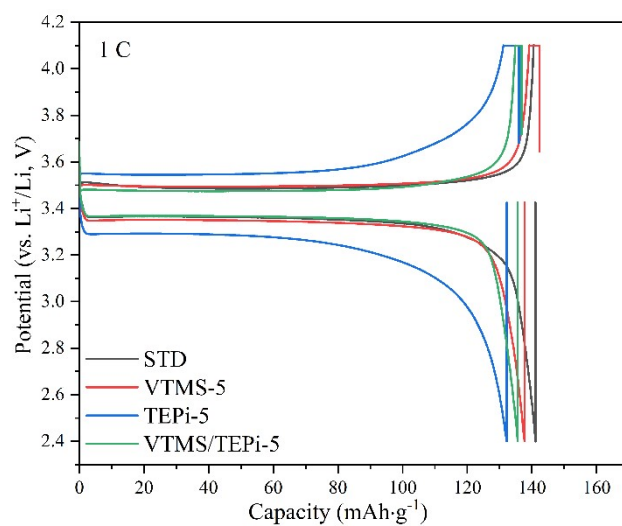

Figure S4 The electrochemical performance of Li|LiFePO<sub>4</sub> half cells with different additives at 1 C

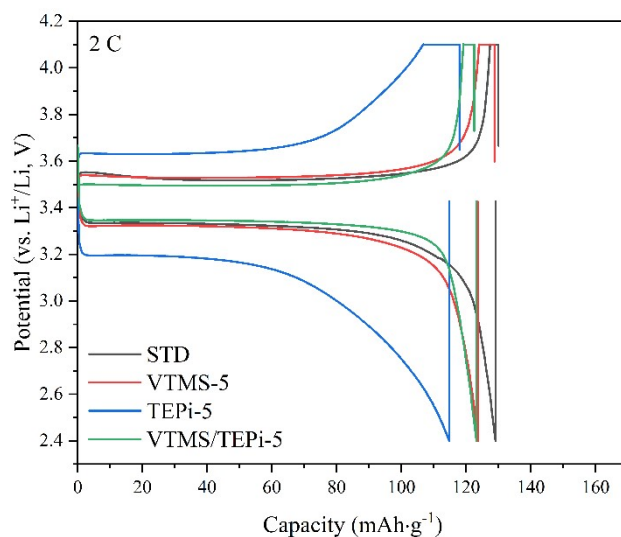

Figure S5 The electrochemical performance of Li|LiFePO<sub>4</sub> half cells with different additives at 2

C

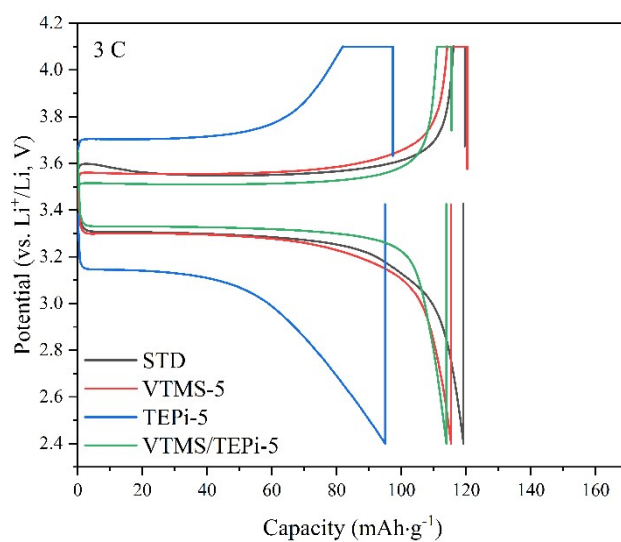

Figure S6 The electrochemical performance of Li|LiFePO<sub>4</sub> half cells with different additives at 3

C

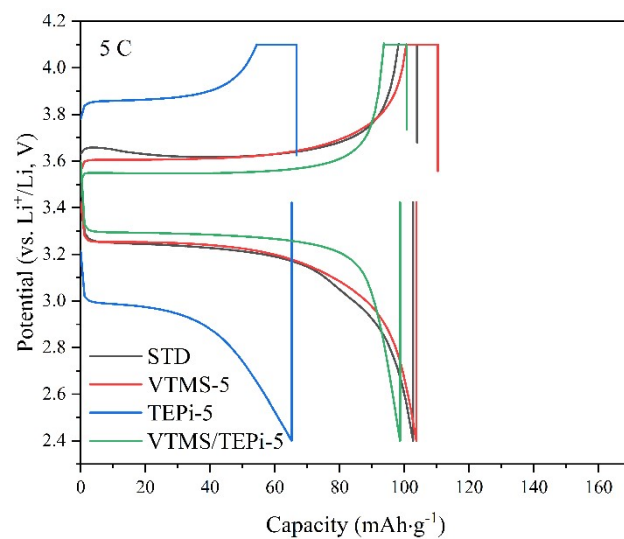

Figure S7 The electrochemical performance of Li|LiFePO<sub>4</sub> half cells with different additives at 5 C

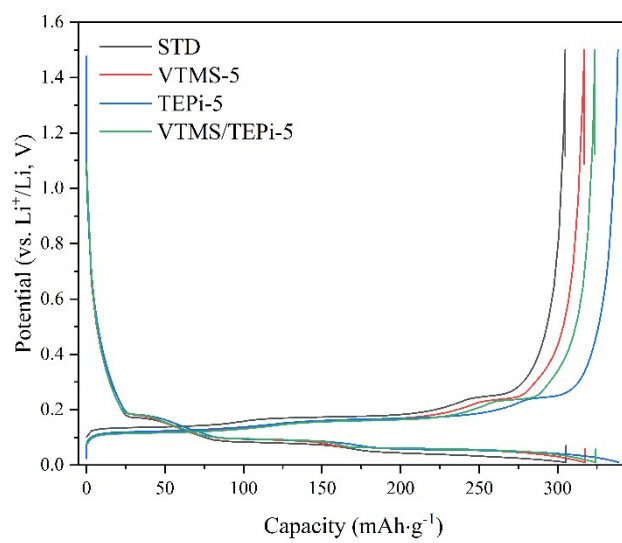

Figure S8 The electrochemical performance of Li|GP half cells in electrolytes with different additives at 0.5 C (25<sup>th</sup> cycle)
